# Supplementary material for: Genome-Wide Identification of Calcium-Dependent Protein Kinases in Chlamydomonas reinhardtii and Functional Analyses in Nitrogen Deficiency-Induced Oil Accumulation
Source: Front Plant Sci. 2019 Oct 22;10:1147. doi: 10.3389/fpls.2019.01147 (PMC6818280; doi:10.3389/fpls.2019.01147)
Supplement: Supplementary file 1 [file Table_1.xlsx]

## Sheet: Table S1
Table S1 Information of query sequences used in Blastp program.
orgnism	gene name	protein name	Accession number	gene_synonym	type
Arabidopsis thaliana	AtCPK1	calcium dependent protein kinase 1	AAO64867	At5g04870	CDPK
Arabidopsis thaliana	AtCPK2	calmodulin-domain protein kinase cdpk isoform 2	ACI49784	At3g10660	CDPK
Arabidopsis thaliana	AtCPK3	calcium-dependent protein kinase 6	NP_194096	At4g23650	CDPK
Arabidopsis thaliana	AtCPK4	calcium-dependent protein kinase 4	NP_192695	At4g09570	CDPK
Arabidopsis thaliana	AtCPK5	calmodulin-domain protein kinase 5	NP_001329080	At4g35310	CDPK
Arabidopsis thaliana	AtCPK6	Calcium-dependent protein kinase family protein	NP_001324056	At2g17290	CDPK
Arabidopsis thaliana	AtCPK7	calmodulin-domain protein kinase 7	NP_568281	At5g12480	CDPK
Arabidopsis thaliana	AtCPK8	calcium-dependent protein kinase 19	NP_850853	At5g19450	CDPK
Arabidopsis thaliana	AtCPK9	calmodulin-domain protein kinase 9	AAP68337	At3g20410	CDPK
Arabidopsis thaliana	AtCPK10	calcium-dependent protein kinase 1	AAO42812	At1g18890	CDPK
Arabidopsis thaliana	AtCPK11	calcium-dependent protein kinase 2	NP_174807	At1g35670	CDPK
Arabidopsis thaliana	AtCPK12	calmodulin-like domain protein kinase 9	ABH04489	At5g23580	CDPK
Arabidopsis thaliana	AtCPK13	calcium-dependent protein kinase 13	NP_190753	At3g51850	CDPK
Arabidopsis thaliana	AtCPK14	calcium-dependent protein kinase 14	NP_181717	At2g41860	CDPK
Arabidopsis thaliana	AtCPK15	calcium-dependent protein kinase 15	NP_001329845.	At4g21940	CDPK
Arabidopsis thaliana	AtCPK16	calcium-dependent protein kinase 16	NP_179379	At2g17890	CDPK
Arabidopsis thaliana	AtCPK17	calcium-dependent protein kinase 17	AAU95457	At5g12180	CDPK
Arabidopsis thaliana	AtCPK18	calcium-dependent protein kinase 18	NP_001190932	At4g36070	CDPK
Arabidopsis thaliana	AtCPK19	calcium-dependent protein kinase 19	NP_176386	At1g61950	CDPK
Arabidopsis thaliana	AtCPK20	calcium-dependent protein kinase 20	NP_181425	At2g38910	CDPK
Arabidopsis thaliana	AtCPK21	calcium-dependent protein kinase 21	NP_001319867	At4g04720	CDPK
Arabidopsis thaliana	AtCPK22	calcium-dependent kinase-like protein	NP_001329213	At4g04710	CDPK
Arabidopsis thaliana	AtCPK23	calcium-dependent protein kinase 23	NP_001328081	At4g04740	CDPK
Arabidopsis thaliana	AtCPK24	calcium-dependent protein kinase 24	NP_180708	At2g31500	CDPK
Arabidopsis thaliana	AtCPK25	calcium-dependent protein kinase 25	NP_001318361	At2g35890	CDPK
Arabidopsis thaliana	AtCPK26	calcium-dependent protein kinase 26	ABJ98560	At4g38230	CDPK
Arabidopsis thaliana	AtCPK27	calcium-dependent protein kinase 27	NP_192379	At4g04700	CDPK
Arabidopsis thaliana	AtCPK28	calcium-dependent protein kinase 28	BAH19797	At5g66210	CDPK
Arabidopsis thaliana	AtCPK29	calcium-dependent protein kinase 29	NP_001320822	At1g76040	CDPK
Arabidopsis thaliana	AtCPK30	calcium-dependent protein kinase 30	AAP68339.1	At1g74740	CDPK
Arabidopsis thaliana	AtCPK31	calcium-dependent protein kinase 31	NP_680596	At4g04695	CDPK
Arabidopsis thaliana	AtCPK32	calcium-dependent protein kinase 32	AAS76761	At3g57530	CDPK
Arabidopsis thaliana	AtCPK33	calcium-dependent protein kinase 33	AAT06478	At1g50700	CDPK
Arabidopsis thaliana	AtCPK34	calcium-dependent protein kinase 34	NP_197437	At5g19360	CDPK
Oryza sativa	OsCPK1	Calcium-dependent protein kinase 1	A2ZVI7	LOC_Os01g43410	CDPK
Oryza sativa	OsCPK2	Calcium-dependent protein kinase 2	Q5VQQ5	LOC_Os01g59360	CDPK
Oryza sativa	OsCPK3	Calcium-dependent protein kinase 3	Q8LPZ7	LOC_Os01g61590	CDPK
Oryza sativa	OsCPK4	Calcium-dependent protein kinase 4	Q6Z2M9	LOC_Os02g03410	CDPK
Oryza sativa	OsCPK5	Calcium-dependent protein kinase 5	Q0DYK7	LOC_Os02g46090	CDPK
Oryza sativa	OsCPK6	Calcium-dependent protein kinase 6	Q6K968	LOC_Os02g58520	CDPK
Oryza sativa	OsCPK7	Calcium-dependent protein kinase 7	P53684	LOC_Os03g03660	CDPK
Oryza sativa	OsCPK8	Calcium-dependent protein kinase 8	Q75GE8	LOC_Os03g59390	CDPK
Oryza sativa	OsCPK9	Calcium-dependent protein kinase 9	Q6AVI8	LOC_Os03g48270	CDPK
Oryza sativa	OsCPK10	Calcium-dependent protein kinase 10	Q6F3A6	LOC_Os03g57450	CDPK
Oryza sativa	OsCPK11	Calcium-dependent protein kinase 11	Q852N6	LOC_Os03g57510	CDPK
Oryza sativa	OsCPK12	Calcium-dependent protein kinase 12	Q7XSQ5	LOC_Os04g47300	CDPK
Oryza sativa	OsCPK13	Calcium-dependent protein kinase 13	Q9FXQ3	LOC_Os04g49510	CDPK
Oryza sativa	OsCPK14	Calcium-dependent protein kinase 14	B9FKW9	LOC_Os05g41270	CDPK
Oryza sativa	OsCPK15	Calcium-dependent protein kinase 15	Q6I587	LOC_Os05g50810	CDPK
Oryza sativa	OsCPK16	Calcium-dependent protein kinase 16	Q6I5I8	LOC_Os05g39090	CDPK
Oryza sativa	OsCPK17	Calcium-dependent protein kinase 17	Q7XIM0	LOC_Os07g06740	CDPK
Oryza sativa	OsCPK18	Calcium-dependent protein kinase 18	Q0D715	LOC_Os07g22710	CDPK
Oryza sativa	OsCPK19	Calcium-dependent protein kinase 19	P53683	LOC_Os07g33110	CDPK
Oryza sativa	OsCPK20	Calcium-dependent protein kinase 20	Q84SL0	LOC_Os07g38120	CDPK
Oryza sativa	OsCPK21	Calcium-dependent protein kinase 21	Q6ZIU9	LOC_Os08g42750	CDPK
Oryza sativa	OsCPK22	Calcium-dependent protein kinase 22	Q69IM9	LOC_Os09g33910	CDPK
Oryza sativa	OsCPK23	Calcium-dependent protein kinase 23	P53682	LOC_Os10g39420	CDPK
Oryza sativa	OsCPK24	Calcium-dependent protein kinase 24	Q53P85	LOC_Os11g07040	CDPK
Oryza sativa	OsCPK25	Calcium-dependent protein kinase 25	Q2RAV0	LOC_Os11g04170	CDPK
Oryza sativa	OsCPK26	Calcium-dependent protein kinase 26	Q2QY37	LOC_Os12g03970	CDPK
Oryza sativa	OsCPK27	Calcium-dependent protein kinase 27	Q2QQR2	LOC_Os12g30150	CDPK
Oryza sativa	OsCPK28	Calcium-dependent protein kinase 28	Q2QX45	LOC_Os12g07230	CDPK
Oryza sativa	OsCPK29	Calcium-dependent protein kinase 29	Q2QVG8	LOC_Os12g12860	CDPK
Oryza sativa	OsCPK30	Calcium-dependent protein kinase 30		LOC_Os07g44710	CDPK
Oryza sativa	OsCPK31	Calcium-dependent protein kinase 31	AK110341		CDPK
